# Supplementary material for: Facile synthesis of Ti3C2Tx@gold nanoparticle-arginine and serine-functionalized graphene quantum dot aerogel for electrochemical detection of chloramphenicol
Source: Royal Society of Chemistry journal article supplement (doi:10.1039/d3nj03319h), 2023-01-01
Supplement: d3nj03319h1.pdf [file d3nj03319h1.pdf]

## Electronic Supporting Information (ESI)

# Facile synthesis of $Ti_3C_2T_x$ @gold nanoparticle–arginine and serine functionalized graphene quantum dot aerogel for electrochemical detection of chloramphenicol

Wei Mengyu,<sup>a</sup> Li Ruiyi<sup>b</sup> Li Zaijun\*<sup>a</sup>

<sup>a</sup> School of Chemical and Material Engineering, Jiangnan University, Wuxi 214122, China.

<sup>b</sup> School of Life Science and Health Engineering, Jiangnan University, Wuxi 214122, China.

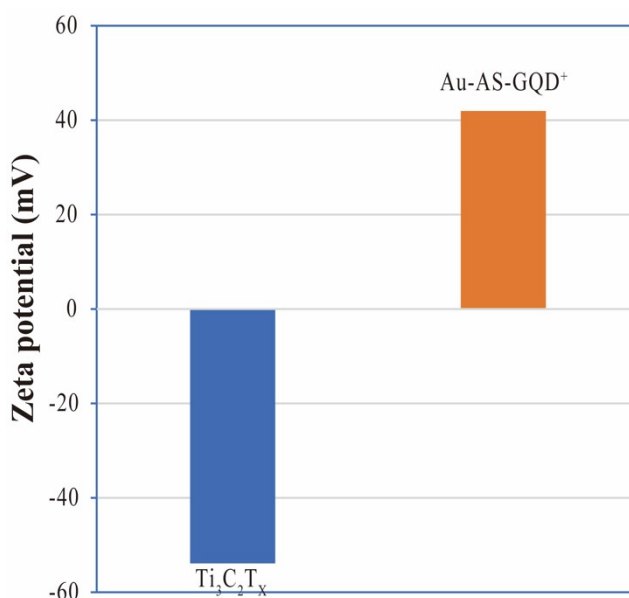

**Fig. s1** Zeta potential of Au-AS-GQD<sup>+</sup> and Ti<sub>3</sub>C<sub>2</sub>T<sub>x</sub>

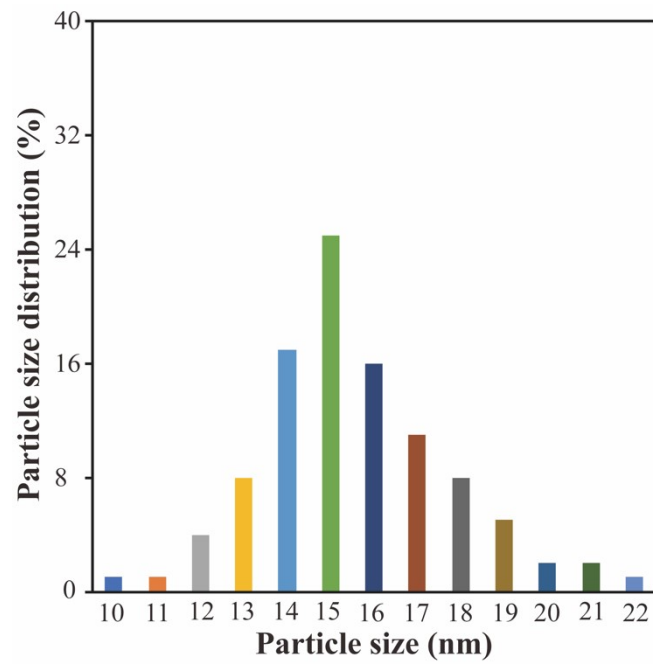

**Fig. s2** Particle size distribution of gold nanoparticles

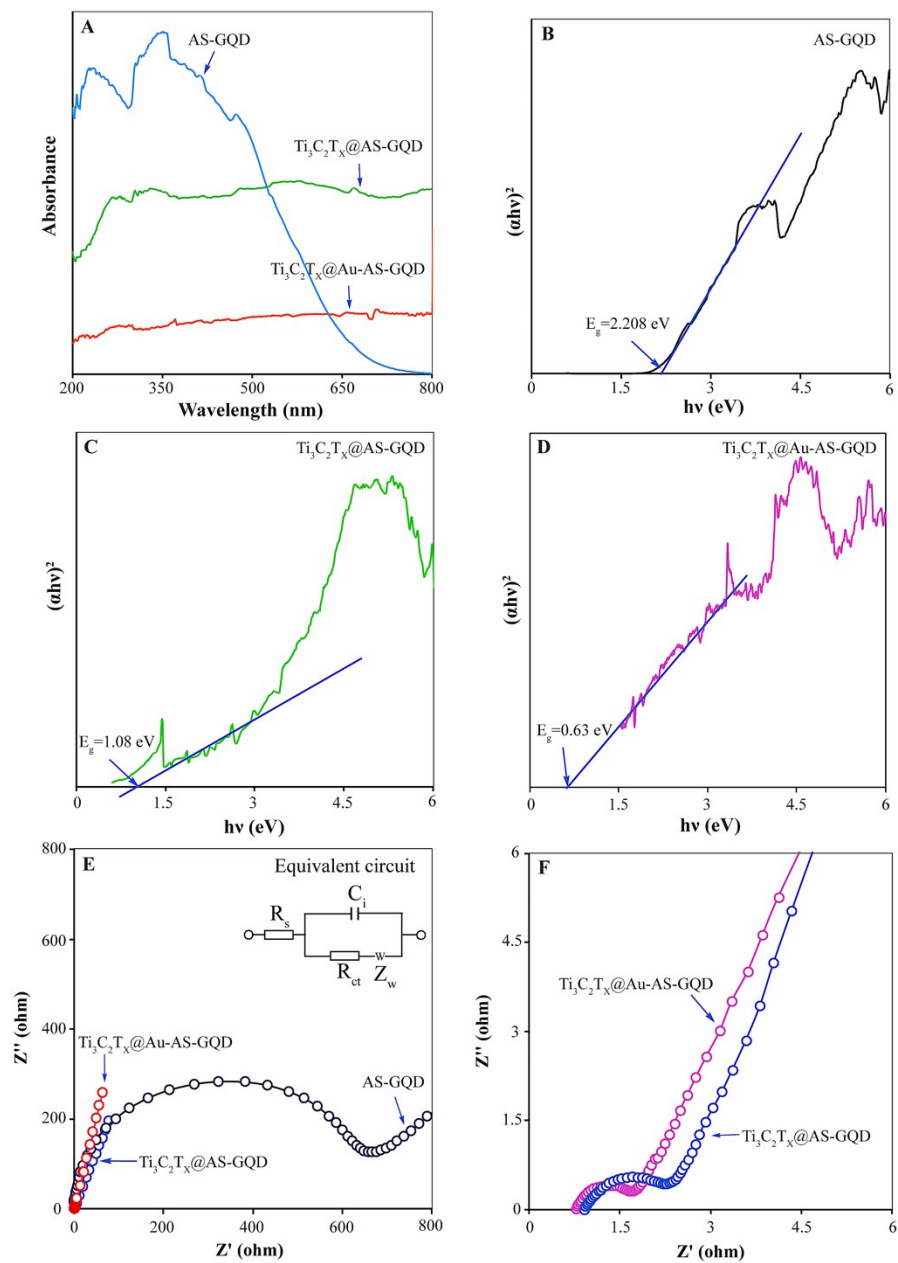

**Fig. S3** UV-visible diffuse reflectance spectra (A) of AS-GQD,  $\text{Ti}_3\text{C}_2\text{T}_x\text{@AS-GQD}$  and  $\text{Ti}_3\text{C}_2\text{T}_x\text{@Au-AS-GQD}$ , the plots of the transformed Kubelka-Munk function vs. the energy of light for AS-GQD (B),  $\text{Ti}_3\text{C}_2\text{T}_x\text{@AS-GQD}$  (C) and  $\text{Ti}_3\text{C}_2\text{T}_x\text{@Au-AS-GQD}$  (D), and Nyquist plots (E and F) of AS-GQD,  $\text{Ti}_3\text{C}_2\text{T}_x\text{@AS-GQD}$  and  $\text{Ti}_3\text{C}_2\text{T}_x\text{@Au-AS-GQD}$

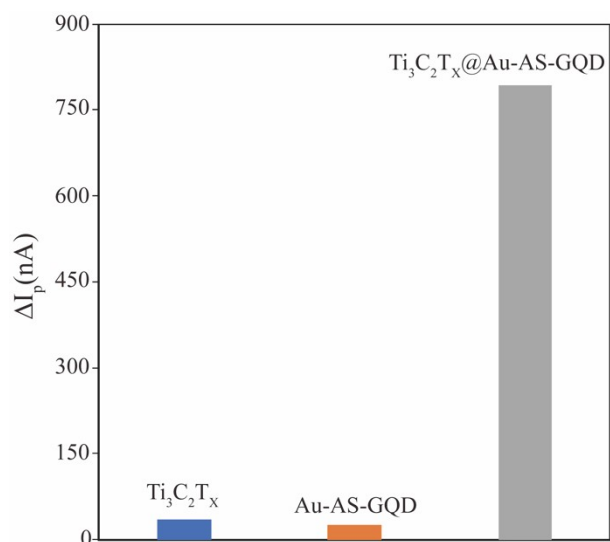

Fig. s4 The  $\Delta I_p$  values caused by 100  $\mu M$  chloramphenicol of different electrodes

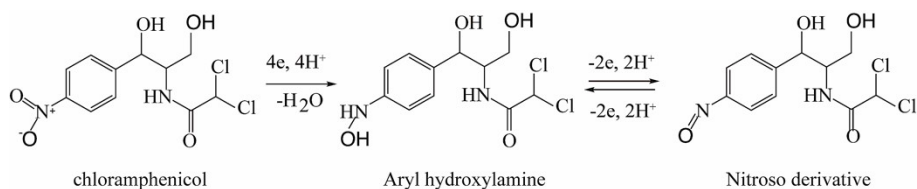

Fig. s5 One possible redox mechanism of chloramphenicol at  $Ti_3C_2T_x@Au-AS-GQD/GCE$

Table s1 EIS parameters for different electrodes

| Electrode modification process | $R_s$ ( $\Omega$ ) | $R_{ct}$ ( $\Omega$ ) | Capcitance(F)          | Warburg, $Y_o$ |
|--------------------------------|--------------------|-----------------------|------------------------|----------------|
| AS-GQD                         | 58.95              | 340.5                 | $5.313 \times 10^{-6}$ | 0.00066        |
| $Ti_3C_2T_x@AS-GQD$            | 0.251              | 0.31                  | $2.323 \times 10^{-7}$ | 0.000266       |
| $Ti_3C_2T_x@Au-AS-GQD$         | 0.255              | 0.22                  | $1.281 \times 10^{-7}$ | 0.000172       |
